# Supplementary material for: Effect of Extraction Method on the Bioactive Composition, Antimicrobial Activity and Phytotoxicity of Pomegranate By-Products
Source: MDPI journal article supplement (doi:10.3390/foods11070992), 2022-03-29
Supplement: s1 [file s1]

## Supplementary Material

**Table S1.** Inhibition halos (mm) caused by penicillin, kanamycin (antibiotics) and amphotericin B (anti-fungal) on the tested microorganisms (n=18).

|                      | Conventional Extraction |            |                | Sonication-assisted Extraction |            |                |
|----------------------|-------------------------|------------|----------------|--------------------------------|------------|----------------|
|                      | Penicillin              | Kanamycin  | Amphotericin B | Penicillin                     | Kanamycin  | Amphotericin B |
| <i>E. coli</i>       | 2.2 ± 2.7               | 15.6 ± 5.9 | -              | 4.3 ± 2.5                      | 17.5 ± 0.8 | -              |
| <i>P. aeruginosa</i> | 24.7 ± 2.5              | 22.7 ± 2.5 | -              | 26.6 ± 3.2                     | 23.3 ± 0.9 | -              |
| <i>S. aureus</i>     | 8.9 ± 2.3               | 14.8 ± 1.3 | -              | 12.8 ± 1.7                     | 15.7 ± 0.7 | -              |
| <i>B. cereus</i>     | R                       | 16.8 ± 0.9 | -              | R                              | 18.8 ± 2.4 | -              |
| <i>Y. lipolytica</i> | -                       | -          | 2.2 ± 1.9      | -                              | -          | 5.6 ± 1.9      |

R: resistant.

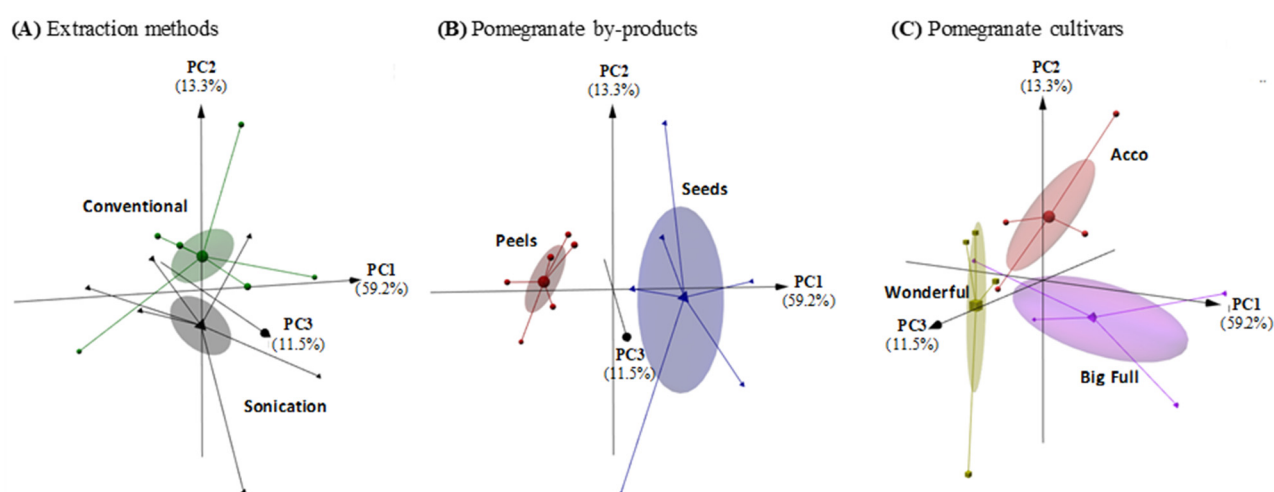

**Figure S1.** 3D-PCA plots for the pomegranate extracts classification based on the experimental analysis according to: (A) the extraction method (conventional or sonication-assisted); (B) the type of by-product (peels or seeds); and (C) the cultivar (Acco, Big Full or Wonderful).

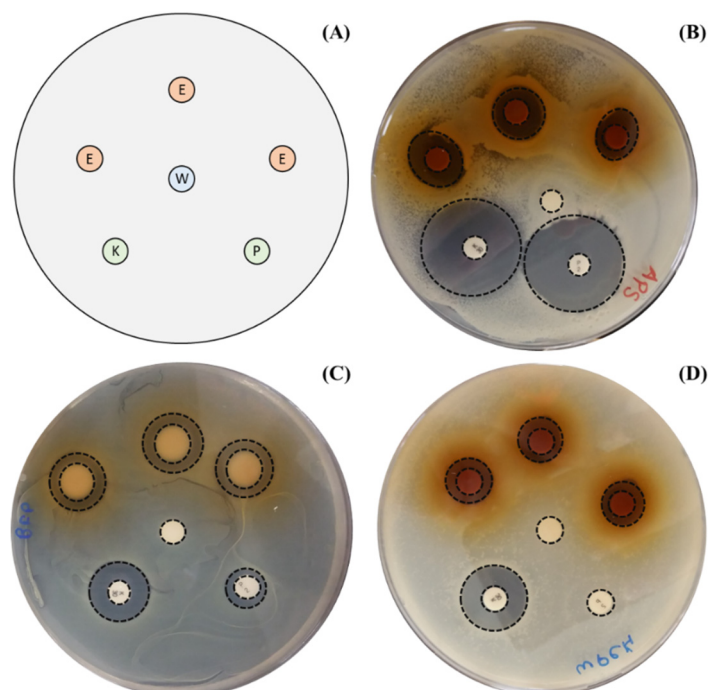

**Figure S2.** Inhibition halos formed due to the antimicrobial activity of the studied extracts: **(A)** schematic representation of a Petri dish with extracts (E), water (W), kanamycin (K) and penicillin (P); **(B)** inhibition halos of Acco peel extracts (sonication extraction) against *P. aeruginosa*; **(C)** inhibition halos of Big Full peel extracts (conventional extraction) against *S. aureus*; and, **(D)** inhibition halos for Wonderful peel extracts (sonication extraction) against *B. cereus*.

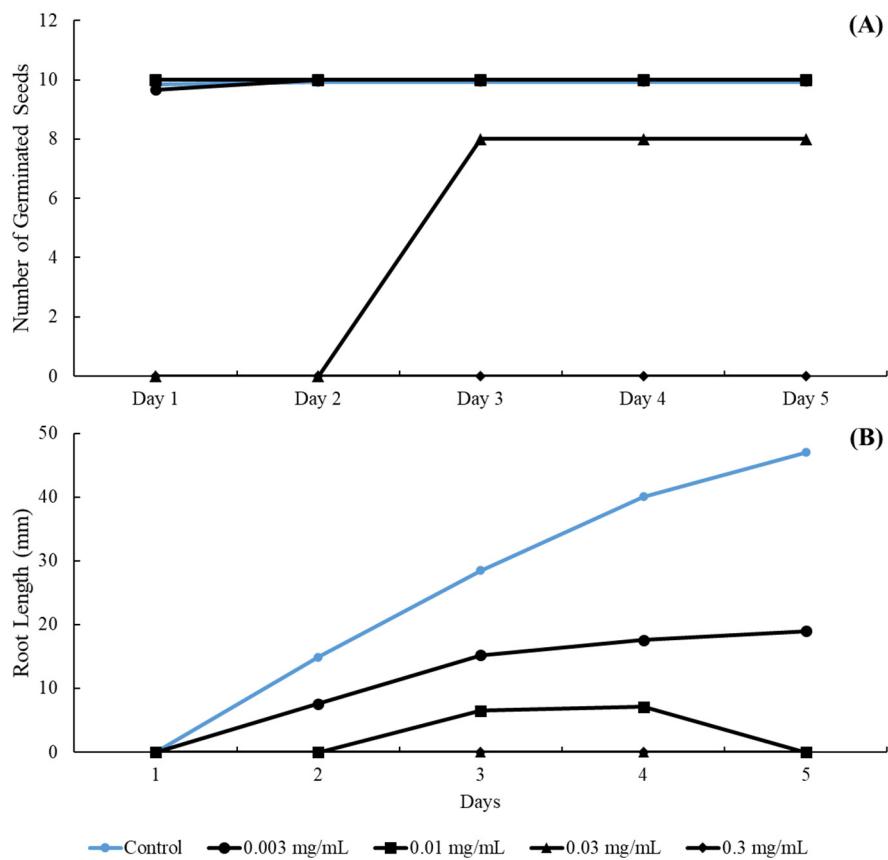

**Figure S3.** Preliminary phytotoxicity test against garden-cress seeds with extracts from Wonderful peel (sonication extraction) to determine **(A)** the number of germinated seeds; and **(B)** roots length (mm) of the germinated seeds.
